# Supplementary material for: The Association of Asthma with Anxiety, Depression, and Mild Cognitive Impairment among Middle-Aged and Elderly Individuals in Saudi Arabia
Source: MDPI journal article supplement (doi:10.3390/bs13100842), 2023-10-16
Supplement: s1 [file s1]

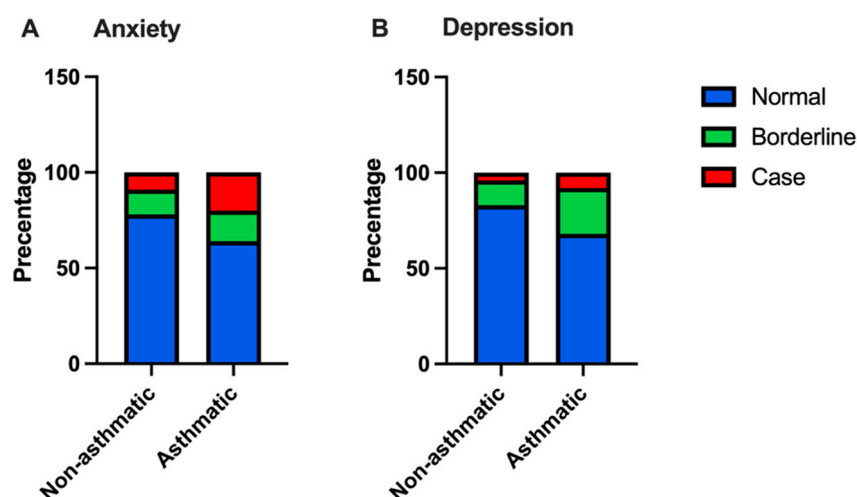

**Supplementary Figure S1:** The prevalence of (A) anxiety and (B) depression among asthmatic compared to non-asthmatic individuals.

**Supplementary Table S1:** Mean scores ( $\pm$  SD) of anxiety, depression, and cognition using study questionnaires and ANOVA p-values without controlling for covariates.

| Variables              | Asthmatic<br>(n=84) | Non-asthmatic<br>(n=159) | Total<br>(n=243) | P-value <sup>b</sup> |
|------------------------|---------------------|--------------------------|------------------|----------------------|
| Anxiety                | 6.2 $\pm$ 4.7       | 4.7 $\pm$ 3.5            | 5.2 $\pm$ 4.0    | 0.004                |
| Depression             | 5.2 $\pm$ 3.9       | 4.1 $\pm$ 3.3            | 4.5 $\pm$ 3.6    | 0.01                 |
| MoCA Test <sup>a</sup> | 23.7 $\pm$ 5.0      | 25.5 $\pm$ 3.7           | 24.9 $\pm$ 4.2   | 0.004                |

**Supplementary Table S2:** Multinomial logistic regression on the association between asthma and categories of anxiety and depression, while controlling for covariates.

| Variables                       | Anxiety             |             |                     |             | Depression                        |             |                                   |             |
|---------------------------------|---------------------|-------------|---------------------|-------------|-----------------------------------|-------------|-----------------------------------|-------------|
|                                 | Borderline          |             | Case                |             | Borderline                        |             | Case                              |             |
|                                 | OR<br>(CI 95%)      | P-<br>value | OR<br>(CI 95%)      | P-<br>value | OR<br>(CI 95%)                    | P-<br>value | OR<br>(CI 95%)                    | P-<br>value |
| Age                             | 0.99<br>(0.95-1.03) | 0.7         | 0.97<br>(0.93-1.02) | 0.3         | 0.99<br>(0.95-1.03)               | 0.6         | 0.98<br>(0.92-1.05)               | 0.6         |
| Gender<br>(Female) <sup>a</sup> | 1.39<br>(0.52-3.73) | 0.5         | 3.57<br>(0.79-16.1) | 0.1         | -                                 | -           | -                                 | -           |
| BMI                             | 1.02<br>(0.95-1.09) | 0.6         | 1.05<br>(0.99-1.13) | 0.09        | 1.01<br>(0.95-1.07)               | 0.7         | <b>1.09</b><br><b>(1.00-1.20)</b> | <b>0.05</b> |
| Asthma                          | 1.46<br>(0.65-3.27) | 0.3         | 2.02<br>(0.87-4.68) | 0.1         | <b>2.10</b><br><b>(1.00-4.43)</b> | <b>0.05</b> | 1.72<br>(0.50-5.93)               | 0.4         |

<sup>a</sup> Gender was removed from the model for depression because some categories had only one gender

**Supplementary Table S3:** Binomial logistic regression on the association between asthma and anxiety and depression

| Variables              | Anxiety <sup>a</sup> |         | Depression <sup>a</sup>            |             |
|------------------------|----------------------|---------|------------------------------------|-------------|
|                        | OR<br>(CI 95%)       | P-value | OR<br>(CI 95%)                     | P-value     |
| <b>Age</b>             | 0.98<br>(0.95-1.02)  | 0.3     | 0.99<br>(0.95- 1.03)               | 0.5         |
| <b>Gender (Female)</b> | 1.39<br>(0.83-4.51)  | 0.1     | 1.12<br>(0.49-2.61)                | 0.8         |
| <b>BMI</b>             | 1.03<br>(0.98-1.09)  | 0.2     | 1.03<br>(0.98-1.09)                | 0.2         |
| <b>Asthma</b>          | 1.70<br>(0.90- 3.19) | 0.1     | <b>1.99</b><br><b>(1.02- 3.90)</b> | <b>0.05</b> |

<sup>a</sup> Borderline and cases were combined into one category.

**Supplementary Table S4:** Multinomial logistic regression on the association between asthma severity and anxiety and depression and MCI while controlling for covariates.

| Variables                     | Anxiety/Depression    |         |                                   |              | Cognition                         |             |
|-------------------------------|-----------------------|---------|-----------------------------------|--------------|-----------------------------------|-------------|
|                               | Anxiety or Depression |         | Anxiety & Depression              |              | Mild cognitive impairment         |             |
|                               | OR<br>(CI 95%)        | P-value | OR<br>(CI 95%)                    | P-value      | OR<br>(CI 95%)                    | P-value     |
| <b>Gender (Female)</b>        | 0.46<br>(0.10-2.04)   | 0.3     | 1.35<br>(0.21- 8.65)              | 0.7          | 0.40<br>(0.09- 1.74)              | 0.2         |
| <b>BMI</b>                    | 0.98<br>(0.88-1.07)   | 0.6     | 1.03<br>(0.94-1.13)               | 0.4          | 1.03<br>(0.95-1.12)               | 0.4         |
| <b>Age</b>                    | 0.94<br>(0.88-1.01)   | 0.1     | 0.97<br>(0.91-1.03)               | 0.4          | <b>1.07</b><br><b>(1.01-1.13)</b> | <b>0.02</b> |
| <b>Asthma severity (Mild)</b> |                       |         |                                   |              |                                   |             |
| <b>Sever</b>                  | 2.41<br>(0.38-15.8)   | 0.3     | <b>10.8</b><br><b>(1.81-64.6)</b> | <b>0.009</b> | 2.24<br>(0.42-11.8)               | 0.3         |
| <b>Moderate</b>               | 0.89<br>(0.23-3.40)   | 0.9     | 1.63<br>(0.37-7.21)               | 0.5          | 1.02<br>(0.35-3.00)               | 0.9         |
